# Supplementary material for: Optimizing white light emission in Dy( iii ) complexes: impact of energy transfer from mono and bidentate ligands on luminescence
Source: Royal Society of Chemistry journal article supplement (doi:10.1039/d4ra03897e), 2024-01-01
Supplement: d4ra03897e1.pdf [file d4ra03897e1.pdf]

## Optimizing White Light Emission in Dy(III) Complexes: Impact of Energy Transfer from Mono and Bidentate Ligands on Luminescence

Sofia Malik<sup>a</sup>, Komal Jakhar<sup>a\*</sup>, Devender Singh<sup>a\*</sup>, Anjali Hooda<sup>a</sup>, Sonia Redhu<sup>a</sup>, Swati Dalal<sup>a</sup>, Vandana Aggarwal<sup>a</sup>, Sumit Kumar<sup>b</sup>, Rajender Singh Malik<sup>b</sup> and Parvin Kumar<sup>c</sup>

<sup>a</sup>Department of Chemistry, Maharshi Dayanand University, Rohtak-124001, Haryana, India

<sup>b</sup>Department of Chemistry, DCR University of Science & Technology, Murthal -131039 Haryana, India.

<sup>c</sup>Department of Chemistry, Kurukshetra University Kurukshetra -136119, Haryana, India.

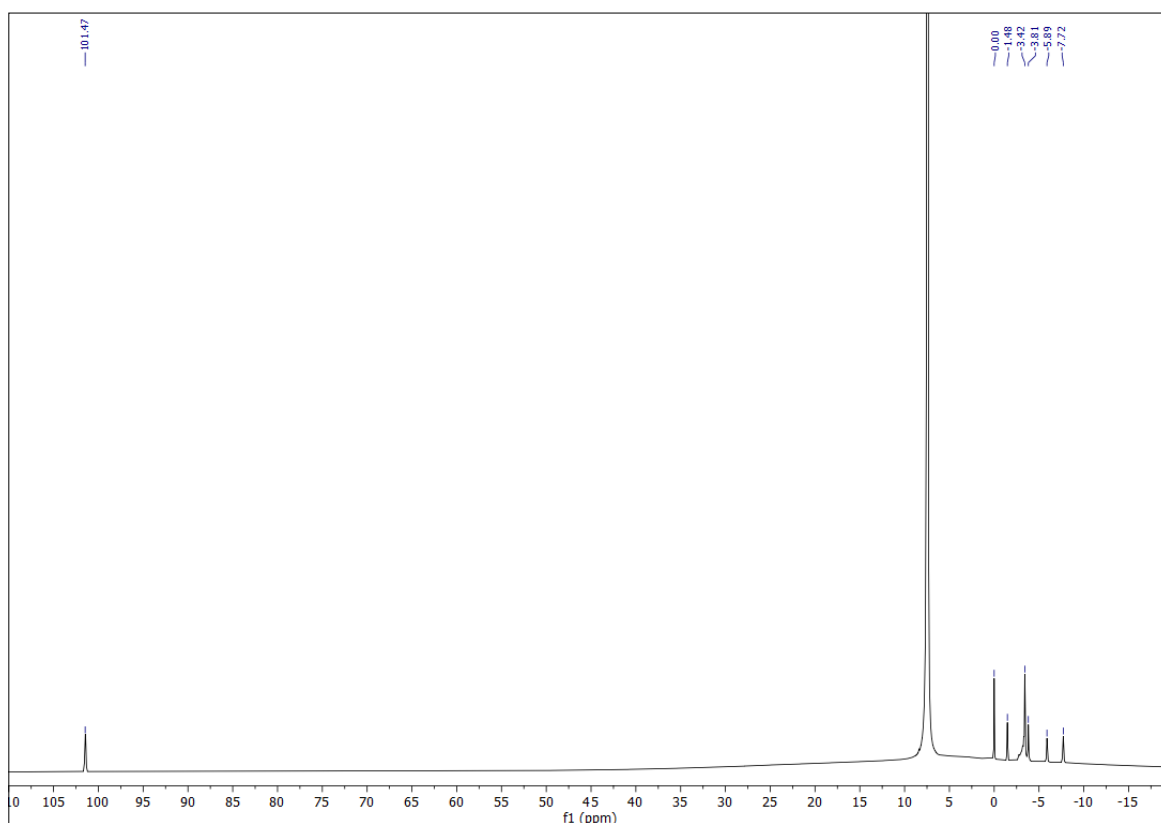

Fig. S1 <sup>1</sup>H NMR spectrum of Dy1

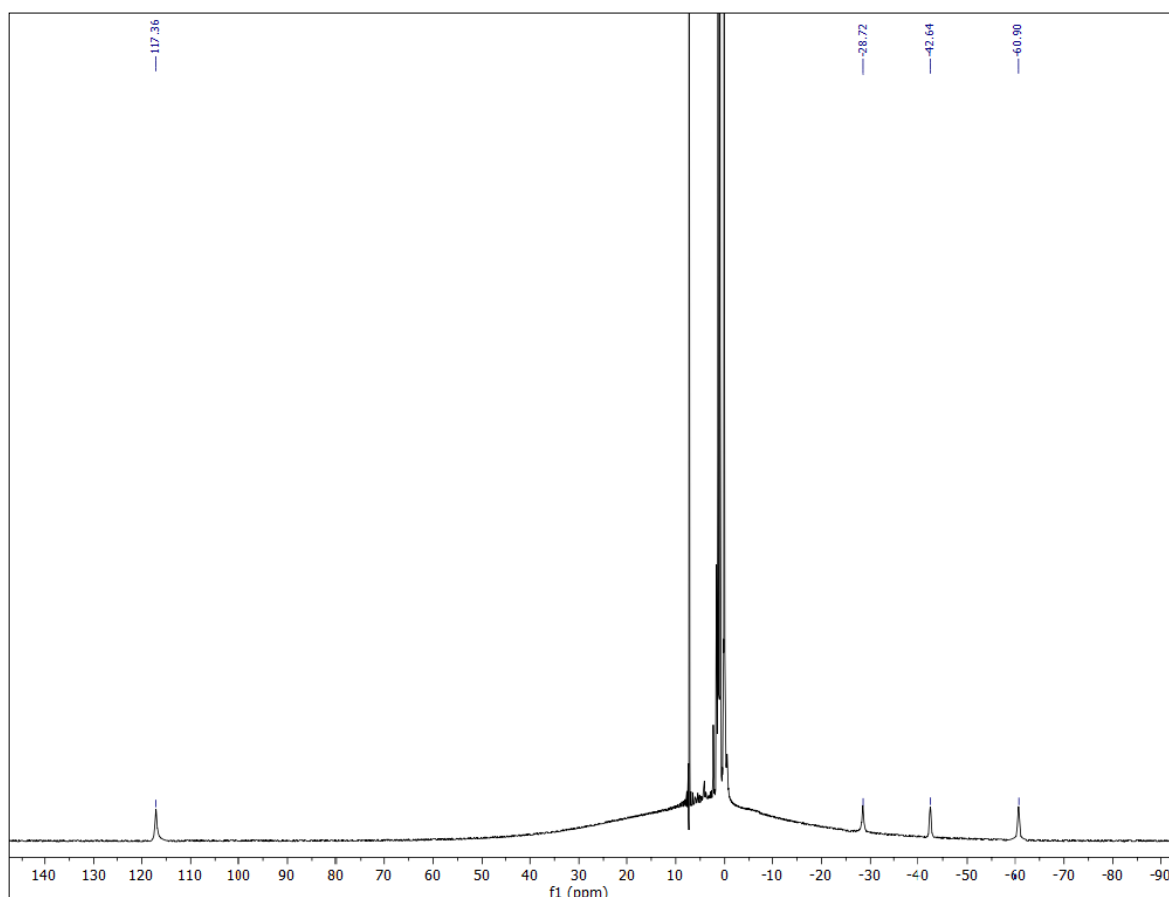

**Fig. S2**  $^1\text{H}$  NMR spectrum of Dy2

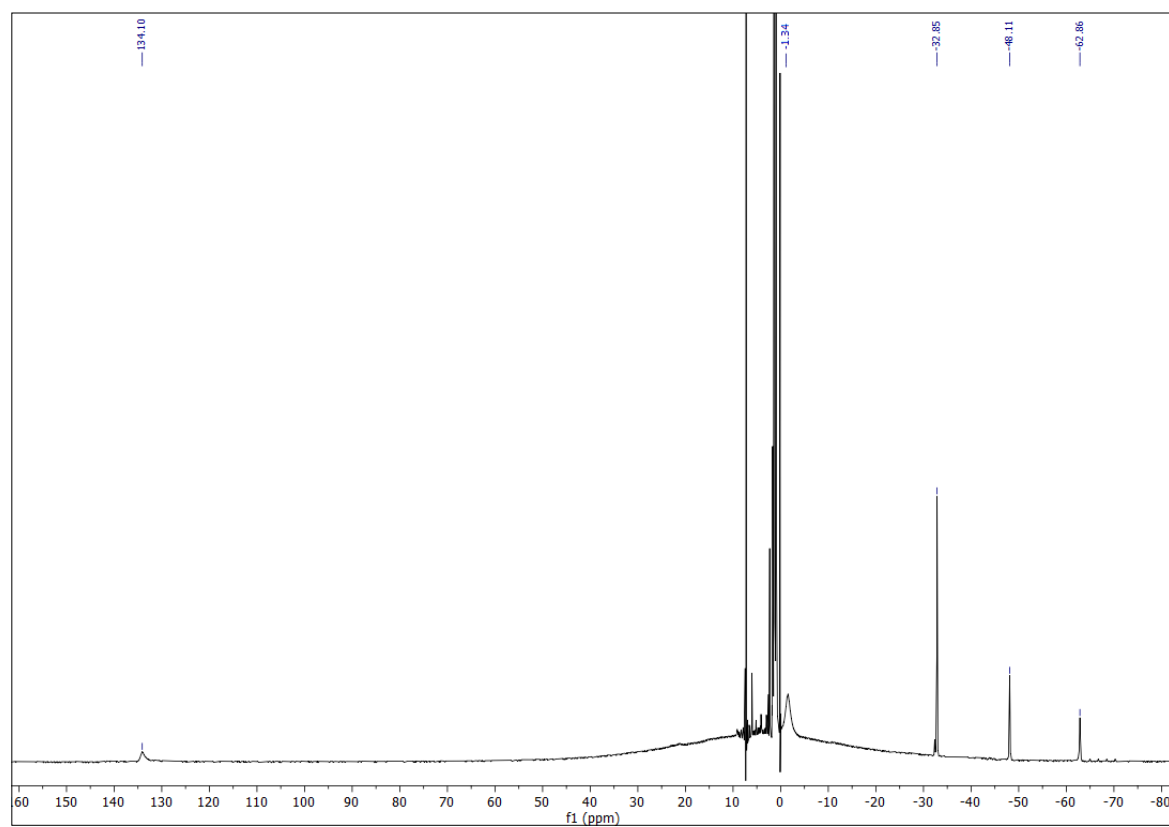

**Fig. S3**  $^1\text{H}$  NMR spectrum of Dy3

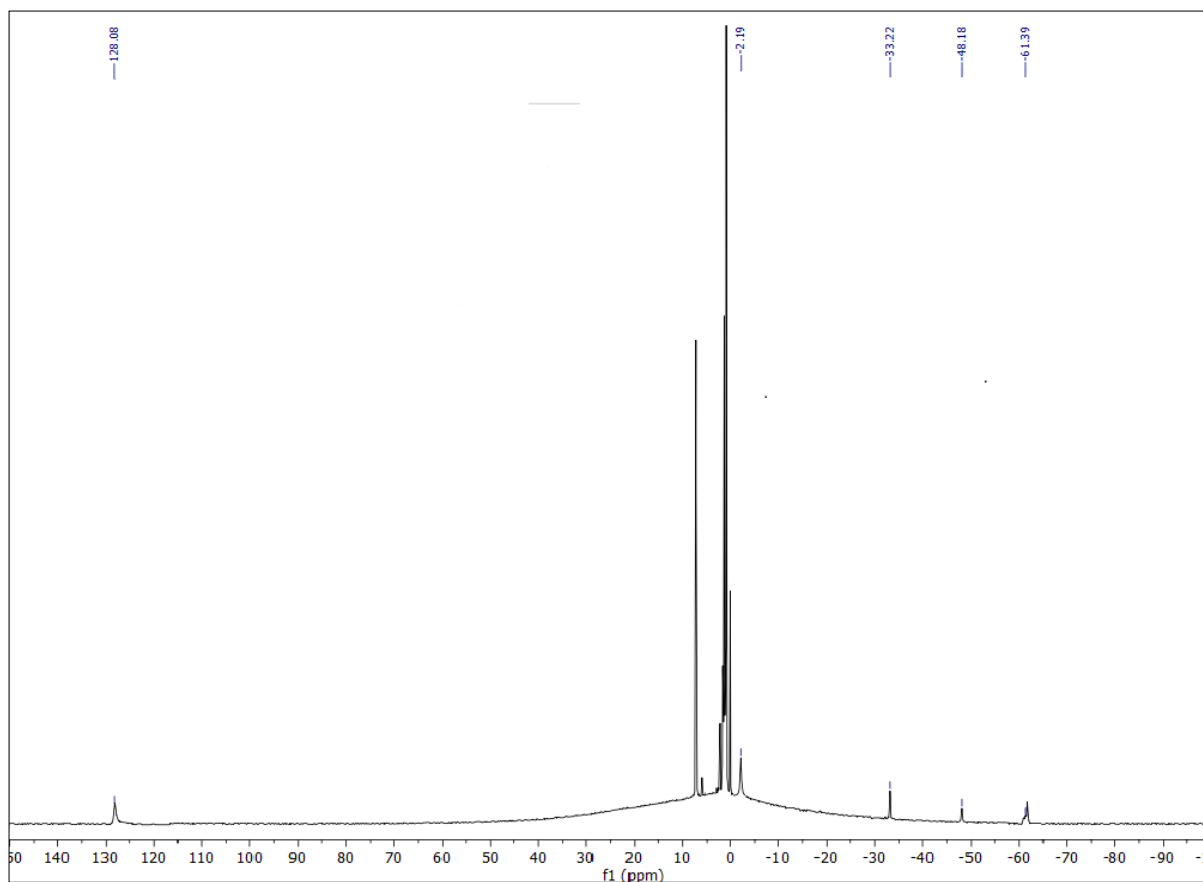

Fig. S4 <sup>1</sup>H NMR spectrum of Dy4

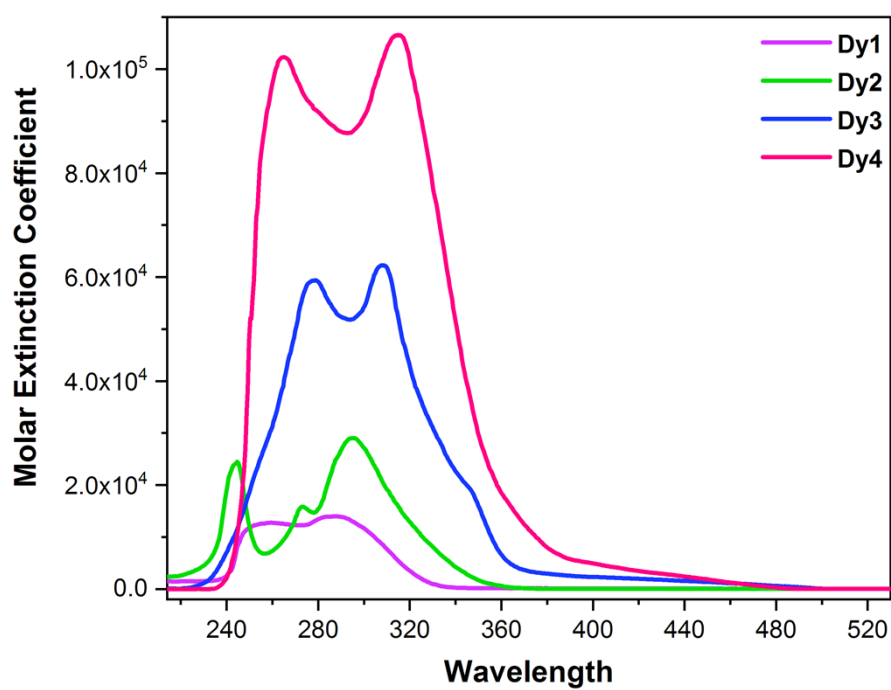

Fig. S5 UV-Vis spectra of the Dy1-Dy4

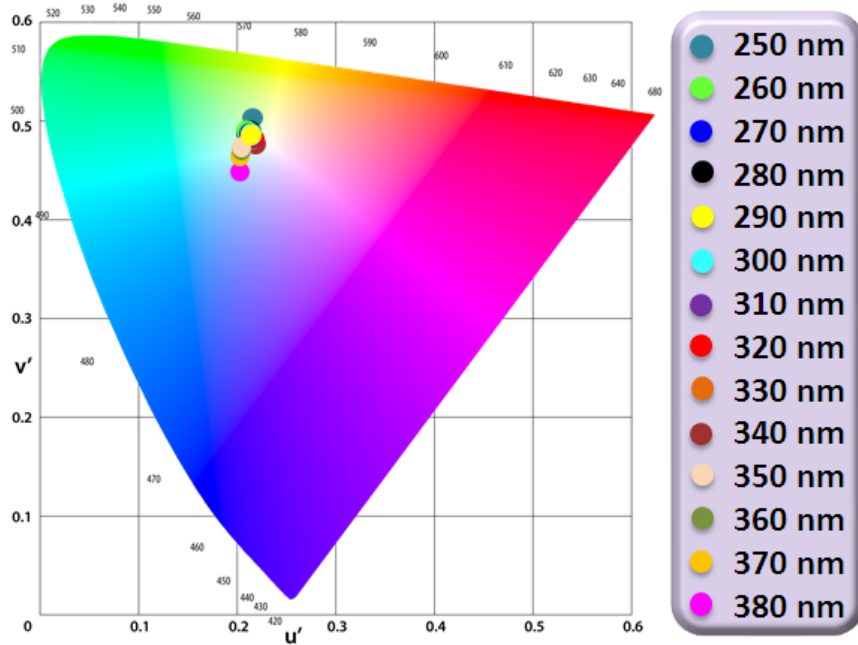

Fig. S8 CIE 1976 color coordinates for Dy<sup>3+</sup> complex at different  $\lambda_{ex}$

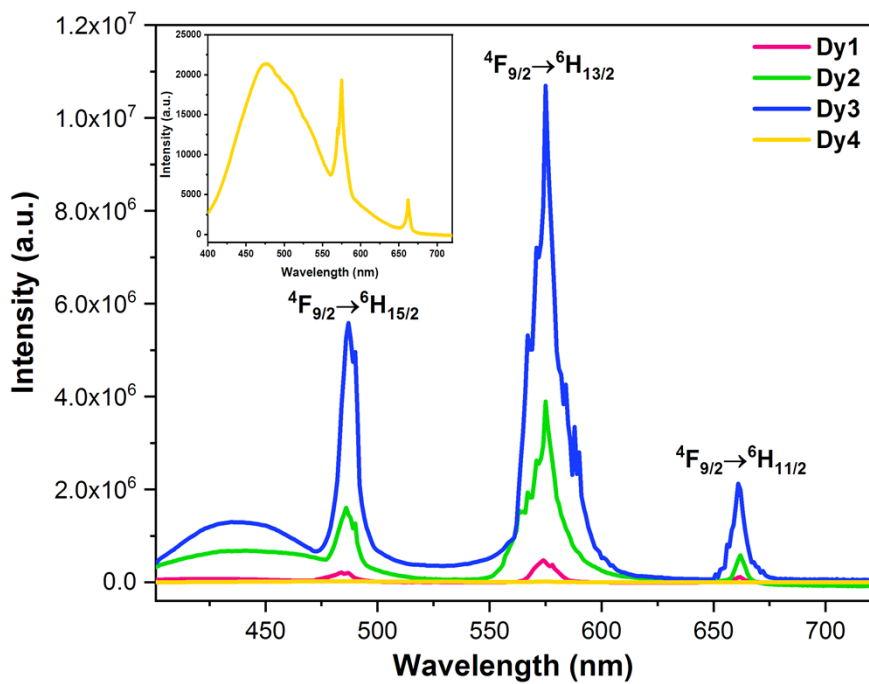

Fig. S7 Emission spectra of Dy1-Dy4 complexes

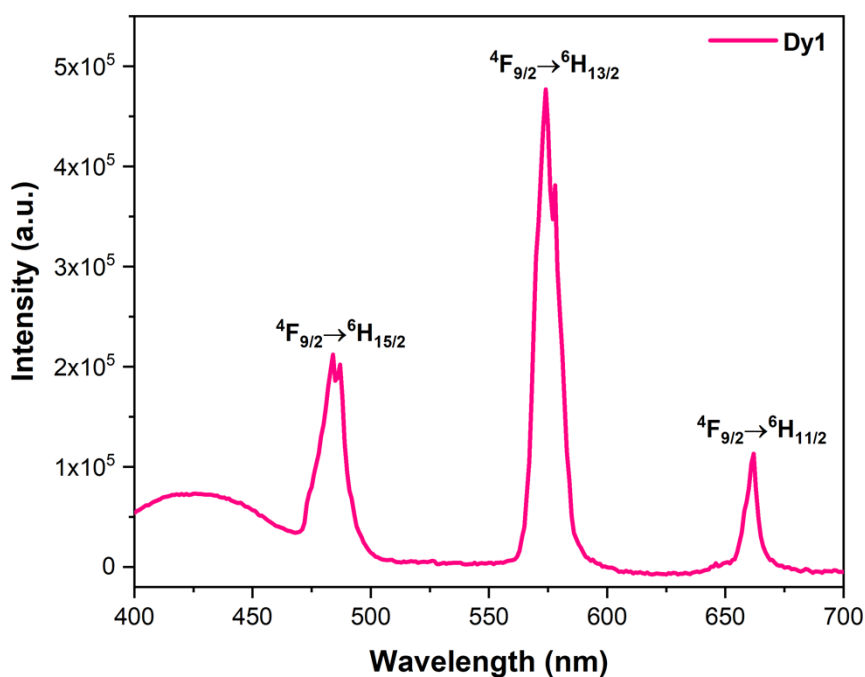

**Fig. S8** Emission spectra of Dy1 complex

**Table S1** Color Characteristics corresponding to Dy3 at different excitation wavelength (250 nm-380 nm)

| Excitation Wavelength | (x, y)           | (u', v')         |
|-----------------------|------------------|------------------|
| 250                   | (0.3651, 0.3868) | (0.2113, 0.5037) |
| 260                   | (0.3560, 0.3744) | (0.2100, 0.4969) |
| 270                   | (0.3545, 0.3714) | (0.2101, 0.4954) |
| 280                   | (0.3545, 0.3714) | (0.2101, 0.4954) |
| 290                   | (0.3537, 0.3690) | (0.2105, 0.4942) |
| 300                   | (0.3552, 0.3712) | (0.2107, 0.4954) |
| 310                   | (0.3540, 0.3684) | (0.2110, 0.4939) |
| 320                   | (0.3542, 0.3684) | (0.2111, 0.4939) |
| 330                   | (0.3519, 0.3648) | (0.2109, 0.4920) |
| 340                   | (0.3515, 0.3614) | (0.2120, 0.4903) |
| 350                   | (0.3433, 0.3566) | (0.2083, 0.4868) |
| 360                   | (0.3402, 0.3510) | (0.2083, 0.4836) |
| 370                   | (0.3189, 0.3200) | (0.2057, 0.4644) |
| 380                   | (0.3008, 0.2846) | (0.2070, 0.4406) |
